# Supplementary material
Source: Springer Nature journal article supplement (https://www.springermedizin.de/resource/supplementary/12967_2011_849_MOESM7_ESM.pdf/9577204)

**A**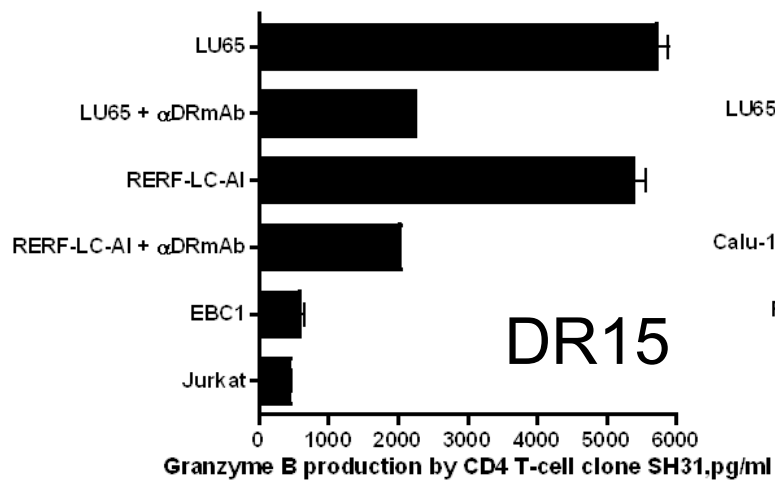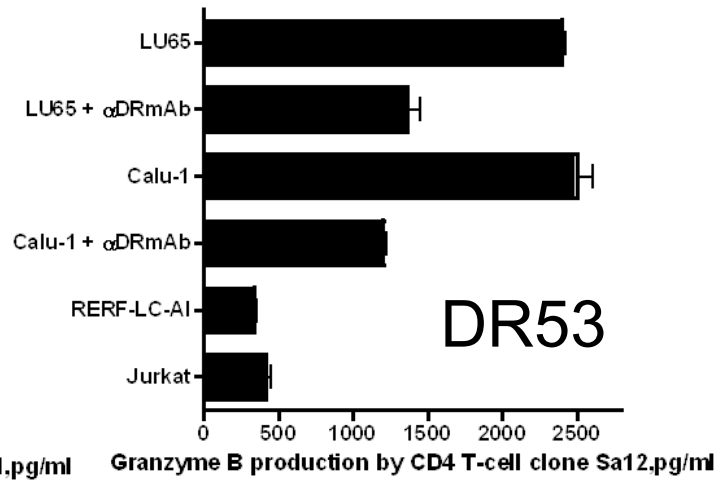**B**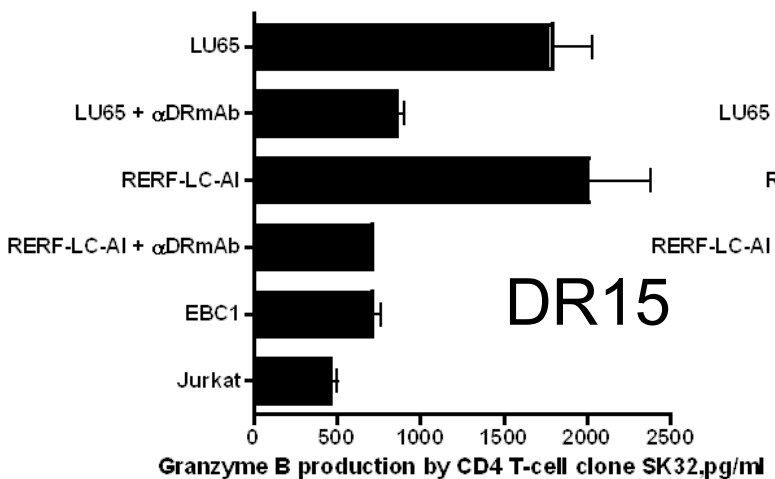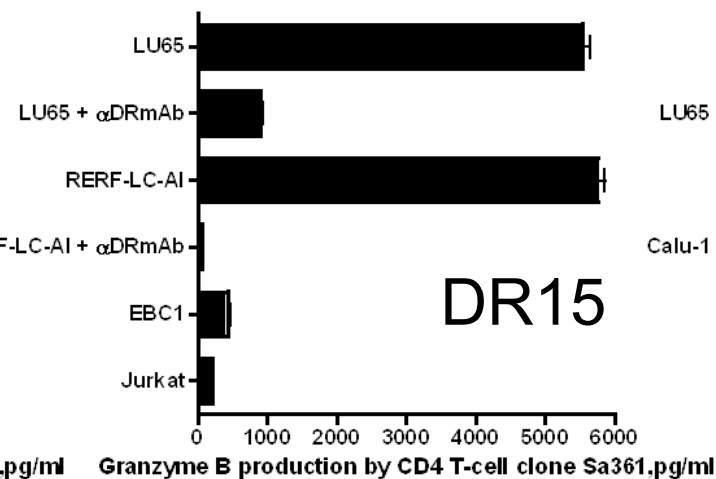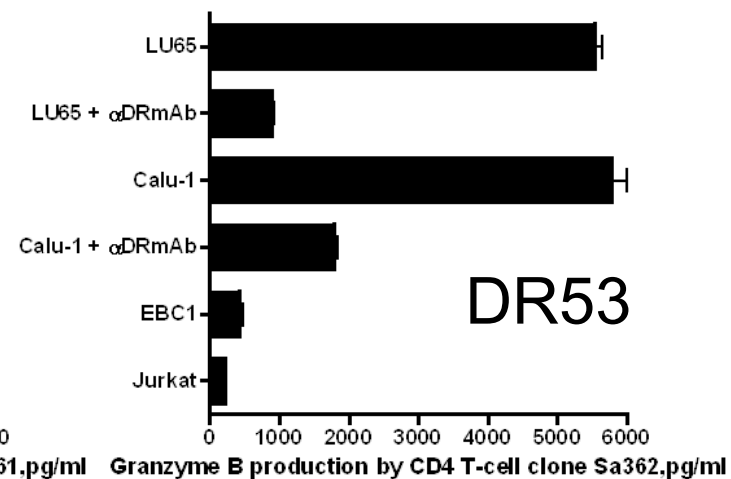

Supplement: MOESM7 [file 9577204]
